# Supplementary material for: Influence of non-covalent interactions on the coordination geometry of Ni(ii) in Ni(ii)–M(ii) complexes (M = Zn and Hg) with a salen-type N2O2 Schiff base ligand and thiocyanate ion as the coligand
Source: Royal Society of Chemistry journal article supplement (doi:10.1039/d2ce01632j), 2023-01-01
Supplement: d2ce01632j1.pdf [file d2ce01632j1.pdf]

## Supporting Information

### Importance of the non-covalent interactions on the coordination geometry of Ni(II) in Ni(II)-M(II) complexes (M = Zn and Hg) with a salen type N<sub>2</sub>O<sub>2</sub> Schiff base ligand and thiocyanate as coligand

Lakshmi Kanta Das<sup>a</sup>, Pradip Bhunia<sup>b</sup>, Rosa M. Gomila<sup>c</sup>, Antonio Frontera<sup>c\*</sup> and Ashutosh Ghosh<sup>b,d\*</sup>

<sup>a</sup>Department of Chemistry, Government General Degree College, Kharagpur-II, Ambigeria, Madpur, Paschim Medinipur-721149, West Bengal, India.

<sup>b</sup>Department of Chemistry, University College of Science, University of Calcutta, 92, A.P.C. Road, Kolkata-700 009, India.

<sup>c</sup>Departament de Química, Universitat de les Illes Balears, Crta de Valldemossa km 7.5, 07122 Palma de Mallorca (Balears), Spain; E-mail: [toni.frontera@uib.es](mailto:toni.frontera@uib.es)

<sup>d</sup>Rani Rashmoni Green University, Tarakeswar, Hooghly 712410, West Bengal, India; E-mail: [ghosh\\_59@yahoo.com](mailto:ghosh_59@yahoo.com) (Corresponding author)

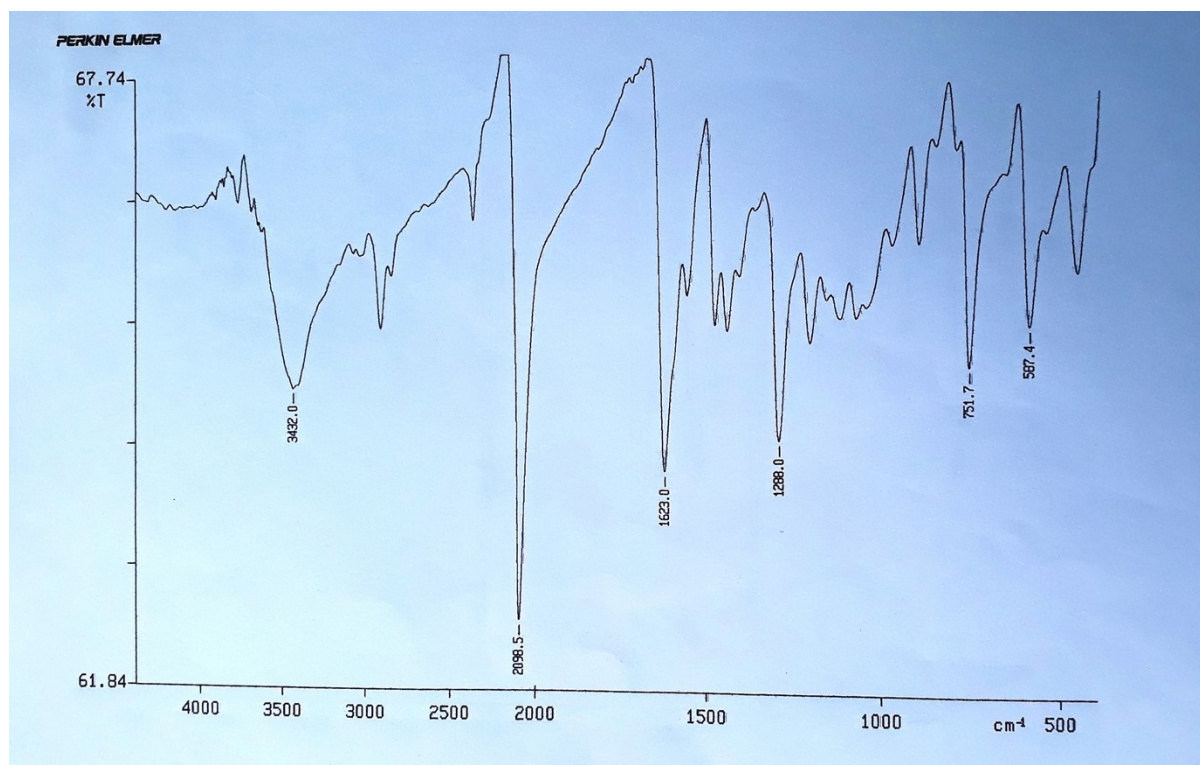

Fig. S1. IR spectrum of complex 1.

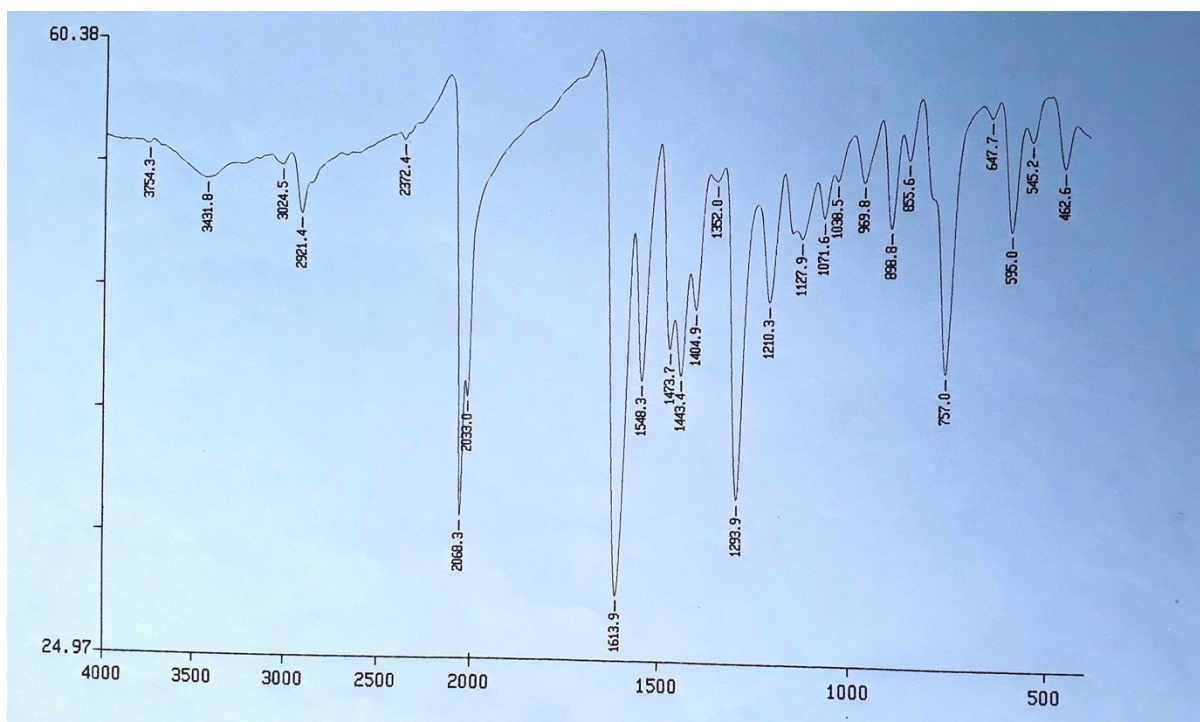

**Fig. S2.** IR spectrum of complex 2.

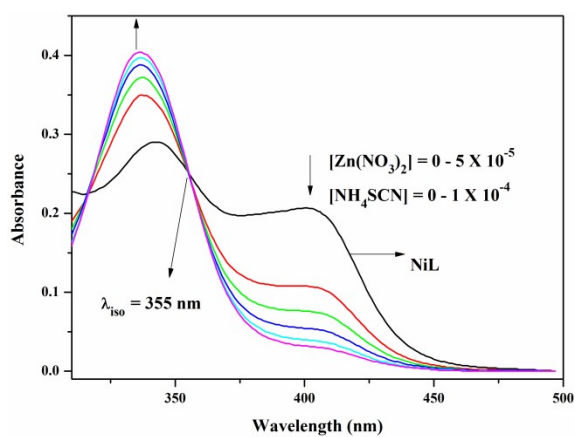

**Fig. S3.** Spectrophotometric titration of the metalloligand ( $5 \times 10^{-5} \text{ M}$ ) by a mixture of  $\text{Zn}(\text{NO}_3)_2$  ( $5 \times 10^{-3} \text{ M}$ ) and  $\text{NH}_4\text{SCN}$  ( $1 \times 10^{-2} \text{ M}$ ) in methanol. The range of concentration in the figure indicates their final concentration in solution.

**Table S1.** Bond distances (Å) and angles (°) around metal atoms for complexes **1** and **2**.

| Bond distances (Å)                         |            |                 |            |
|--------------------------------------------|------------|-----------------|------------|
| <b>1</b>                                   |            | <b>2</b>        |            |
| Zn(1)-O(1)                                 | 1.950(2)   | Hg(1)-S(1)      | 2.383(3)   |
| Zn(1)-O(2)                                 | 1.959(2)   | Hg(1)-S(2)      | 2.411(3)   |
| Zn(1)-N(3)                                 | 1.934(3)   | Hg(1)-O(1)      | 2.410(5)   |
| Zn(1)-N(4)                                 | 1.939(2)   | Hg(1)-O(2)      | 2.588(4)   |
| Ni(1)-S(1) <sup>a</sup>                    | 2.557(2)   | Ni(1)-O(1)      | 1.869(5)   |
| Ni(1)-S(2) <sup>b</sup>                    | 2.703(2)   | Ni(1)-O(2)      | 1.844(5)   |
| Ni(1)-O(1)                                 | 2.008(2)   | Ni(1)-N(1)      | 1.871(6)   |
| Ni(1)-O(2)                                 | 2.027(2)   | Ni(1)-N(2)      | 1.868(6)   |
| Ni(1)-N(1)                                 | 2.008(2)   |                 |            |
| Ni(1)-N(2)                                 | 2.007(2)   |                 |            |
| Bond angles (°)                            |            |                 |            |
| <b>1</b>                                   |            | <b>2</b>        |            |
| O(1)-Zn(1)-O(2)                            | 81.90(7)   | S(1)-Hg(1)-S(2) | 155.97(9)  |
| O(1)-Zn(1)-N(3)                            | 113.97(10) | S(1)-Hg(1)-O(1) | 101.60(15) |
| O(1)-Zn(1)-N(4)                            | 114.97(9)  | S(1)-Hg(1)-O(2) | 100.53(13) |
| O(2)-Zn(1)-N(3)                            | 121.70(9)  | S(2)-Hg(1)-O(1) | 102.22(15) |
| O(2)-Zn(1)-N(4)                            | 110.02(9)  | S(2)-Hg(1)-O(2) | 88.91(12)  |
| N(3)-Zn(1)-N(4)                            | 111.46(11) | O(1)-Hg(1)-O(2) | 59.21(15)  |
| S(1) <sup>a</sup> -Ni(1)-S(2) <sup>b</sup> | 168.11(3)  | O(1)-Ni(1)-O(2) | 83.6(2)    |
| S(1) <sup>a</sup> -Ni(1)-O(1)              | 89.96(6)   | O(1)-Ni(1)-N(1) | 91.3(2)    |
| S(1) <sup>a</sup> -Ni(1)-O(2)              | 82.91(5)   | O(1)-Ni(1)-N(2) | 169.3(3)   |
| S(1) <sup>a</sup> -Ni(1)-N(1)              | 99.08(6)   | O(2)-Ni(1)-N(1) | 168.7(2)   |
| S(1) <sup>a</sup> -Ni(1)-N(2)              | 90.99(7)   | O(2)-Ni(1)-N(2) | 94.8(2)    |
| S(2) <sup>b</sup> -Ni(1)-O(1)              | 89.26(6)   | N(1)-Ni(1)-N(2) | 92.1(3)    |
| S(2) <sup>b</sup> -Ni(1)-O(2)              | 85.30(5)   |                 |            |
| S(2) <sup>b</sup> -Ni(1)-N(1)              | 92.80(6)   |                 |            |
| S(2) <sup>b</sup> -Ni(1)-N(2)              | 87.56(7)   |                 |            |
| O(1)-Ni(1)-O(2)                            | 78.83(7)   |                 |            |
| O(1)-Ni(1)-N(1)                            | 90.97(9)   |                 |            |
| O(1)-Ni(1)-N(2)                            | 169.00(8)  |                 |            |
| O(2)-Ni(1)-N(1)                            | 169.64(9)  |                 |            |
| O(2)-Ni(1)-N(2)                            | 90.41(8)   |                 |            |
| N(1)-Ni(1)-N(2)                            | 99.70(10)  |                 |            |

Symmetry transformation <sup>a</sup> = 1-x,-y,1-z and <sup>b</sup> = 1-x,1-y,-z for **1** and <sup>a</sup> = 1-x,-y,1-z for **2**
